# Supplementary material
Source: publisher site journal article supplement (https://www.dovepress.com/article/391943)
Supplement: Supplementary file 1 [file get_supplementary_file.php]

Supplementary Table 1. Descriptions of HRV indices

| Index | | Unit | Description |
| --- | --- | --- | --- |
| Frequency-domain analysis | HF | ms2 | The HF band (0.15-0.40Hz) corresponds with heart rate fluctuations relating to respiratory cycle, named respiratory sinus arrhythmia. It reflects parasympathetic nervous activity. |
| LF | ms2 | The LF band (0.04-0.15Hz) reflects an activity of baroreceptor, controlled by both sympathetic and parasympathetic nervous systems. |
| LF/HF |  | The ratio of LF power to HF reflects sympatho-vagal balance, indicating that high LF/HF indicates higher sympathetic nervous activity and low LF/HF corresponds with higher parasympathetic activity compared to sympathetic nervous system. |
| HFnu |  | The HFnu indicates relative power of the HF band, calculated by the following formula: . |
| TP | ms2 | The TP band (0.00-0.40Hz) represents whole activities of autonomic nervous system. |
| Time-domain analysis | RMSSD | ms | The root mean square of successive differences between normal heartbeats. It correlates with parasympathetic activity. |
| SDNN | ms | The standard deviation of normal-to-normal intervals. It reflects both sympathetic and parasympathetic nervous activities and correlates with LF and TP. |
| pNN50 | % | The percentage of adjacent normal-to-normal intervals that differ from each other by more than 50 ms. It is closely corresponded with parasympathetic nervous activity. |

Abbreviations: HF, high frequency; HFnu, high frequency normalized unit; LF, low frequency; LF/HF, low frequency/ high frequency; pNN50, percentage of successive RR intervals that differ by more than 50 ms; RMSSD, root mean square of successive RR interval differences; SDNN, standard deviation of normal-to-normal intervals; TP, total power
